# Supplementary material for: The impact of a fine-scale population stratification on rare variant association test results
Source: PLoS One. 2018 Dec 6;13(12):e0207677. doi: 10.1371/journal.pone.0207677 (PMC6283567; doi:10.1371/journal.pone.0207677)
Supplement: S2 Table — (CSV) [file pone.0207677.s006.csv]

correction	stratification	nreplicates	prop	migration	CAST	Sum	wSum_betaMAFtot	wSum_MAFtot	wSum_MAFctrl	aSum	SKAT	wSKAT_betaMAFtot	wSKAT_MAFtot	SKATO	wSKATO_betaMAFtot	wSKATO_MAFtot	PODKAT
without_correction	with_stratification	10000	75	0,01	0,2726	0,2596	0,2818	0,3597	0,5732	0,6917	0,6852	0,711	0,7455	0,6652	0,6904	0,7335	0,4114
without_correction	with_stratification	10000	50	0,01	0,1463	0,1392	0,1519	0,1727	0,2859	0,3328	0,3238	0,3344	0,3217	0,3011	0,3155	0,3149	0,1952
without_correction	with_stratification	10000	25	0,01	0,0655	0,0681	0,0741	0,0726	0,1033	0,1082	0,0952	0,0955	0,0866	0,0959	0,0933	0,0899	0,0788
without_correction	with_stratification	10000	100	0,01	0,3969	0,3745	0,4149	0,5585	0,8196	0,8884	0,9044	0,924	0,9603	0,8922	0,914	0,9539	0,6383
without_correction	with_stratification	10000	75	0,025	0,135	0,1321	0,1447	0,1811	0,3084	0,3154	0,3154	0,3301	0,3517	0,2879	0,3043	0,3369	0,1881
without_correction	with_stratification	10000	50	0,025	0,081	0,0806	0,0905	0,1015	0,155	0,155	0,137	0,1426	0,1404	0,1314	0,1331	0,1376	0,0968
without_correction	with_stratification	10000	25	0,025	0,0528	0,0533	0,0583	0,0618	0,0797	0,0749	0,0638	0,0647	0,06	0,069	0,0686	0,0652	0,0586
without_correction	with_stratification	10000	100	0,025	0,2091	0,2019	0,2239	0,3031	0,5184	0,531	0,5622	0,5957	0,6771	0,5316	0,5627	0,6489	0,3234
without_correction	with_stratification	10000	75	0,05	0,0909	0,0885	0,0967	0,116	0,1856	0,182	0,1576	0,1624	0,1675	0,1513	0,1555	0,1702	0,1109
without_correction	with_stratification	10000	50	0,05	0,0592	0,0612	0,0703	0,0745	0,1114	0,1088	0,0878	0,0902	0,0848	0,0885	0,0896	0,0893	0,0717
without_correction	with_stratification	10000	25	0,05	0,0459	0,0469	0,0522	0,0565	0,0687	0,0636	0,0563	0,0567	0,0523	0,056	0,0548	0,0544	0,0539
without_correction	with_stratification	10000	100	0,05	0,1295	0,1204	0,1356	0,1772	0,3106	0,3201	0,2833	0,3016	0,3348	0,2618	0,2778	0,3221	0,1702
without_correction	with_stratification	10000	75	0,1	0,0671	0,0669	0,0734	0,0805	0,1204	0,114	0,0927	0,0948	0,0909	0,0943	0,0957	0,0979	0,0751
without_correction	with_stratification	10000	50	0,1	0,0517	0,0517	0,0586	0,0613	0,0846	0,0726	0,0643	0,0642	0,0577	0,0663	0,0658	0,0631	0,0612
without_correction	with_stratification	10000	25	0,1	0,0428	0,0452	0,052	0,0503	0,0602	0,0564	0,0489	0,0473	0,0434	0,0524	0,052	0,0487	0,0484
without_correction	with_stratification	10000	100	0,1	0,0813	0,0837	0,0912	0,1108	0,1795	0,1705	0,1447	0,1517	0,1564	0,1389	0,1469	0,1574	0,1048
without_correction	without_stratification_1000popActrls	10000	NA	NA	0,0413	0,0417	0,0465	0,0459	0,0477	0,0478	0,047	0,0475	0,0411	0,0497	0,0495	0,0469	0,0481
PCA_model_correction_2PC	with_stratification	10000	75	0,01	0,0557	0,0544	0,0548	0,0615	0,0556	0,1172	0,0564	0,0575	0,06	0,0576	0,0579	0,0591	0,0501
PCA_model_correction_2PC	with_stratification	10000	50	0,01	0,0523	0,0528	0,0545	0,0558	0,056	0,0793	0,0592	0,0584	0,0535	0,0608	0,061	0,0559	0,0539
PCA_model_correction_2PC	with_stratification	10000	25	0,01	0,0492	0,0495	0,0503	0,052	0,0549	0,0605	0,0535	0,0543	0,0513	0,054	0,0537	0,0538	0,0531
PCA_model_correction_2PC	with_stratification	10000	75	0,025	0,0525	0,0578	0,0585	0,0605	0,0531	0,0894	0,0519	0,0525	0,0588	0,0548	0,0545	0,0581	0,0495
PCA_model_correction_2PC	with_stratification	10000	50	0,025	0,0476	0,0485	0,0493	0,0559	0,0555	0,0699	0,058	0,0591	0,059	0,0569	0,059	0,0607	0,055
PCA_model_correction_2PC	with_stratification	10000	25	0,025	0,0519	0,0506	0,0517	0,0514	0,059	0,0592	0,0539	0,0543	0,0533	0,0573	0,0573	0,0551	0,0521
PCA_model_correction_2PC	with_stratification	10000	75	0,05	0,0593	0,0619	0,0639	0,0697	0,08	0,0888	0,0594	0,0596	0,0629	0,0632	0,0647	0,0672	0,0566
PCA_model_correction_2PC	with_stratification	10000	50	0,05	0,0548	0,0571	0,0556	0,0624	0,0808	0,0738	0,0649	0,0654	0,0651	0,0682	0,067	0,0689	0,0599
PCA_model_correction_2PC	with_stratification	10000	25	0,05	0,0529	0,0544	0,0552	0,0559	0,0675	0,0624	0,0579	0,0565	0,0518	0,0565	0,0562	0,0556	0,0555
PCA_model_correction_2PC	with_stratification	10000	75	0,1	0,0734	0,0705	0,0705	0,0804	0,115	0,0999	0,0938	0,0943	0,0906	0,0905	0,0927	0,0965	0,0751
PCA_model_correction_2PC	with_stratification	10000	50	0,1	0,0589	0,0562	0,0585	0,0604	0,0824	0,0714	0,0651	0,064	0,0576	0,0666	0,0652	0,0621	0,0615
PCA_model_correction_2PC	with_stratification	10000	25	0,1	0,0485	0,0515	0,0523	0,0502	0,0591	0,0553	0,0485	0,0468	0,0429	0,0521	0,0516	0,0483	0,0489
PCA_model_correction_5PC	with_stratification	5000	75	0,01	0,0578	0,054	0,0536	0,059	0,0534	0,1188	0,0564	0,0573	0,0597	0,0579	0,0577	0,0592	0,051
PCA_model_correction_5PC	with_stratification	5000	50	0,01	0,056	0,0582	0,0588	0,058	0,0584	0,0796	0,0601	0,0584	0,0543	0,0601	0,0616	0,0573	0,0548
PCA_model_correction_5PC	with_stratification	5000	25	0,01	0,0488	0,0522	0,054	0,0568	0,0616	0,0652	0,0543	0,055	0,0523	0,0546	0,0545	0,0541	0,0542
PCA_model_correction_5PC	with_stratification	5000	75	0,025	0,0566	0,0594	0,0582	0,06	0,0558	0,0932	0,0533	0,0533	0,0598	0,0558	0,0549	0,0586	0,0495
PCA_model_correction_5PC	with_stratification	5000	50	0,025	0,0442	0,0474	0,05	0,0508	0,0518	0,0732	0,0579	0,0592	0,0608	0,0582	0,0584	0,0615	0,0545
PCA_model_correction_5PC	with_stratification	5000	25	0,025	0,05	0,0476	0,0492	0,0508	0,055	0,0582	0,0531	0,0538	0,0536	0,0573	0,0568	0,0555	0,0529
PCA_model_correction_5PC	with_stratification	5000	75	0,05	0,0624	0,0712	0,0704	0,076	0,0844	0,0892	0,0609	0,0599	0,064	0,0638	0,0649	0,069	0,0572
PCA_model_correction_5PC	with_stratification	5000	50	0,05	0,0568	0,064	0,062	0,0648	0,0808	0,078	0,065	0,0653	0,0658	0,0674	0,0665	0,0678	0,0597
PCA_model_correction_5PC	with_stratification	5000	25	0,05	0,0534	0,0568	0,0566	0,0562	0,0672	0,0592	0,055	0,0564	0,0512	0,0557	0,056	0,056	0,0548
PCA_model_correction_5PC	with_stratification	5000	75	0,1	0,073	0,071	0,0698	0,0816	0,116	0,0954	0,0928	0,0932	0,0896	0,0882	0,0916	0,0957	0,0743
PCA_model_correction_5PC	with_stratification	5000	50	0,1	0,0614	0,06	0,0604	0,0636	0,0874	0,0688	0,0652	0,0645	0,0595	0,067	0,0656	0,0644	0,0617
PCA_model_correction_5PC	with_stratification	5000	25	0,1	0,0486	0,0524	0,0518	0,0526	0,0662	0,0544	0,0496	0,0475	0,0439	0,0532	0,0527	0,0481	0,0496
PCA_model_correction_10PC	with_stratification	5000	75	0,01	0,0612	0,0544	0,055	0,0624	0,0514	0,1186	0,0577	0,058	0,0611	0,0592	0,0597	0,0601	0,0517
PCA_model_correction_10PC	with_stratification	5000	50	0,01	0,0558	0,058	0,0558	0,0598	0,0594	0,0812	0,0609	0,0592	0,0573	0,0605	0,0619	0,0579	0,0549
PCA_model_correction_10PC	with_stratification	5000	25	0,01	0,0474	0,0548	0,0558	0,0576	0,0618	0,0674	0,0566	0,0566	0,0528	0,0553	0,0552	0,0546	0,055
PCA_model_correction_10PC	with_stratification	5000	75	0,025	0,0574	0,0582	0,0596	0,0604	0,0534	0,0972	0,0541	0,0556	0,0619	0,056	0,0568	0,0603	0,0497
PCA_model_correction_10PC	with_stratification	5000	50	0,025	0,0458	0,048	0,0494	0,0516	0,0514	0,0754	0,0595	0,0601	0,0615	0,0582	0,0587	0,0633	0,0553
PCA_model_correction_10PC	with_stratification	5000	25	0,025	0,0518	0,0496	0,0488	0,0542	0,0536	0,0552	0,0543	0,0546	0,0554	0,0566	0,0566	0,0561	0,0527
PCA_model_correction_10PC	with_stratification	5000	75	0,05	0,066	0,0722	0,0712	0,0786	0,0818	0,0888	0,0603	0,0619	0,0631	0,0631	0,0647	0,0701	0,0556
PCA_model_correction_10PC	with_stratification	5000	50	0,05	0,0576	0,061	0,0616	0,065	0,0808	0,076	0,0635	0,0634	0,065	0,0651	0,0654	0,0684	0,0592
PCA_model_correction_10PC	with_stratification	5000	25	0,05	0,056	0,0578	0,0566	0,0568	0,065	0,0626	0,0564	0,0566	0,0509	0,0565	0,0561	0,0569	0,057
PCA_model_correction_10PC	with_stratification	5000	75	0,1	0,071	0,0686	0,0702	0,0806	0,114	0,0926	0,0914	0,0922	0,0906	0,0893	0,091	0,0962	0,0738
PCA_model_correction_10PC	with_stratification	5000	50	0,1	0,0624	0,0588	0,0576	0,0636	0,0874	0,0668	0,0643	0,064	0,0593	0,0675	0,0664	0,0654	0,0612
PCA_model_correction_10PC	with_stratification	5000	25	0,1	0,0494	0,051	0,0512	0,0532	0,0658	0,0526	0,0501	0,0498	0,0454	0,0533	0,0532	0,0495	0,0488
PCA_model_correction_2PC	without_stratification_1000popActrls	10000	NA	NA	0,0466	0,0487	0,0469	0,0464	0,0476	0,049	0,0475	0,0474	0,0423	0,05	0,0495	0,0473	0,0481
PCA_model_correction_5PC	without_stratification_1000popActrls	5000	NA	NA	0,0452	0,0496	0,0492	0,0476	0,048	0,0426	0,0452	0,0448	0,0396	0,0498	0,0498	0,0476	0,047
PCA_model_correction_10PC	without_stratification_1000popActrls	5000	NA	NA	0,0454	0,0494	0,0484	0,0478	0,0486	0,042	0,0442	0,0452	0,0414	0,0492	0,0494	0,0466	0,0468
PCA_model_correction_2PC	without_stratification_1250popActrls	10000	NA	NA	0,0483	0,0515	0,0497	0,0469	0,0465	0,0508	0,0496	0,0516	0,0538	0,0517	0,0521	0,0511	0,0415
PCA_model_correction_2PC	without_stratification_1500popActrls	10000	NA	NA	0,0523	0,0503	0,0514	0,0501	0,0507	0,0463	0,0464	0,0459	0,0412	0,0509	0,0506	0,0468	0,0461
PCA_model_correction_2PC	without_stratification_1750popActrls	10000	NA	NA	0,048	0,0467	0,047	0,0475	0,0503	0,0477	0,0445	0,0439	0,039	0,0483	0,048	0,0449	0,046
PCA_permutation_correction_2PC	with_stratification	5000	75	0,01	0,0516	0,0492	0,049	0,0496	0,0512	0,0498	0,0594	0,0594	0,0608	0,0592	0,0612	0,0602	0,0572
PCA_permutation_correction_2PC	with_stratification	5000	50	0,01	0,0484	0,0516	0,0548	0,0506	0,0548	0,05	0,0556	0,0582	0,063	0,0598	0,0612	0,0614	0,0558
PCA_permutation_correction_2PC	with_stratification	5000	25	0,01	0,0442	0,0508	0,0514	0,0538	0,0608	0,0568	0,0616	0,062	0,0612	0,0624	0,0598	0,061	0,0582
PCA_permutation_correction_2PC	with_stratification	5000	75	0,025	0,0516	0,0528	0,0534	0,052	0,06	0,0548	0,059	0,0634	0,0682	0,0618	0,0652	0,0688	0,0552
PCA_permutation_correction_2PC	with_stratification	5000	50	0,025	0,0426	0,0468	0,049	0,0474	0,0548	0,0594	0,064	0,0668	0,0764	0,0626	0,0632	0,0684	0,0582
PCA_permutation_correction_2PC	with_stratification	5000	25	0,025	0,0494	0,0486	0,047	0,0508	0,0554	0,0558	0,0608	0,0612	0,0634	0,058	0,056	0,0588	0,0522
PCA_permutation_correction_2PC	with_stratification	5000	75	0,05	0,0622	0,067	0,0696	0,0744	0,1008	0,0756	0,105	0,1112	0,1224	0,1022	0,108	0,1134	0,084
PCA_permutation_correction_2PC	with_stratification	5000	50	0,05	0,0574	0,0614	0,0618	0,0628	0,0852	0,0752	0,0846	0,0908	0,0924	0,0854	0,0876	0,0868	0,0724
PCA_permutation_correction_2PC	with_stratification	5000	25	0,05	0,0526	0,0584	0,055	0,0564	0,0676	0,0632	0,0588	0,063	0,0608	0,059	0,0558	0,0566	0,059
PCA_permutation_correction_2PC	with_stratification	5000	75	0,1	0,0764	0,0688	0,07	0,0822	0,1156	0,1	0,0932	0,0974	0,1046	0,093	0,0936	0,1014	0,0786
PCA_permutation_correction_2PC	with_stratification	5000	50	0,1	0,059	0,0574	0,0582	0,0608	0,0872	0,0652	0,062	0,0654	0,0684	0,0646	0,065	0,0676	0,061
PCA_permutation_correction_2PC	with_stratification	5000	25	0,1	0,049	0,0502	0,051	0,0508	0,0658	0,0528	0,0492	0,048	0,0492	0,0524	0,05	0,0512	0,048
PCA_permutation_correction_2PC	without_stratification_1000popActrls	5000	NA	NA	0,0464	0,0484	0,0486	0,0462	0,0488	0,0448	0,0472	0,0488	0,0458	0,0486	0,0466	0,0494	0,0462
